# Supplementary material for: Prognostication and Risk Factors for Cystic Fibrosis via Automated Machine Learning
Source: PubMed Central journal article supplement (PMC6062529; doi:10.1038/s41598-018-29523-2), 2018-07-26
Supplement: 41598_2018_29523_MOESM1_ESM.pdf [file 41598_2018_29523_MOESM1_ESM.pdf]

# Prognostication and Risk Factors for Cystic Fibrosis via Automated Machine Learning

Ahmed M. Alaa<sup>1</sup> and Mihaela van der Schaar<sup>1,2,3</sup>

<sup>1</sup>Department of Electrical Engineering, University of California, Los Angeles, CA, 90095, USA

<sup>2</sup>Engineering Science Department, University of Oxford, Oxford, OX1 3PJ, UK

<sup>3</sup>Alan Turing Institute, London, NW1 2DB, UK

\*ahmedmalaa@ucla.edu

## ABSTRACT

**Table S1**

| Variable                       | $F_1$ score     |
|--------------------------------|-----------------|
| Oxygen Therapy                 | $0.5 \pm 0.04$  |
| FEV1                           | $0.47 \pm 0.03$ |
| FEV1 % Predicted               | $0.44 \pm 0.02$ |
| FEV1 % Predicted (2011)        | $0.44 \pm 0.04$ |
| CFRD                           | $0.42 \pm 0.01$ |
| Diabetes                       | $0.38 \pm 0.02$ |
| Heterozygous                   | $0.38 \pm 0.04$ |
| Homozygous                     | $0.37 \pm 0.02$ |
| IV Antibiotic Days in Hospital | $0.34 \pm 0.04$ |
| FEV1 % Predicted (2010)        | $0.34 \pm 0.05$ |
| FEV1 % Predicted (2009)        | $0.34 \pm 0.06$ |
| Oral Corticosteroids           | $0.32 \pm 0.02$ |
| Best FEV1                      | $0.30 \pm 0.01$ |
| Noninvasive Ventilation        | $0.28 \pm 0.02$ |
| FEV1 % Predicted (2008)        | $0.27 \pm 0.03$ |
| IV Antibiotic Days at Home     | $0.24 \pm 0.04$ |
| Weight                         | $0.21 \pm 0.06$ |
| Best FEV1 % Predicted          | $0.21 \pm 0.07$ |
| Height                         | $0.20 \pm 0.06$ |
| Non-IV Hospital Admission      | $0.19 \pm 0.02$ |
| Age                            | $0.19 \pm 0.03$ |

**Table 1.**  $F_1$  scores achieved by individual variables.

**Table S2**

| Variable                       | AUC-PR      |
|--------------------------------|-------------|
| Oxygen Therapy                 | 0.48 ± 0.01 |
| FEV1                           | 0.42 ± 0.01 |
| FEV1 % Predicted               | 0.41 ± 0.02 |
| FEV1 % Predicted (2011)        | 0.41 ± 0.03 |
| CFRD                           | 0.37 ± 0.02 |
| Diabetes                       | 0.35 ± 0.02 |
| Heterozygous                   | 0.33 ± 0.01 |
| Homozygous                     | 0.33 ± 0.01 |
| IV Antibiotic Days in Hospital | 0.33 ± 0.02 |
| FEV1 % Predicted (2010)        | 0.31 ± 0.02 |
| FEV1 % Predicted (2009)        | 0.30 ± 0.03 |
| Oral Corticosteroids           | 0.30 ± 0.04 |
| Best FEV1                      | 0.30 ± 0.05 |
| Noninvasive Ventilation        | 0.29 ± 0.03 |
| FEV1 % Predicted (2008)        | 0.27 ± 0.04 |
| IV Antibiotic Days at Home     | 0.24 ± 0.01 |
| Weight                         | 0.21 ± 0.01 |
| Best FEV1 % Predicted          | 0.19 ± 0.01 |
| Height                         | 0.18 ± 0.01 |
| Non-IV Hospital Admission      | 0.13 ± 0.01 |
| Age                            | 0.11 ± 0.01 |

**Table 2.** Variable importance analysis after including patients lost to follow-up.

**Table S3**

| Variable                       | Score |
|--------------------------------|-------|
| FEV1 % Predicted               | 1     |
| Oxygen Therapy                 | 0.83  |
| IV Antibiotic Days in Hospital | 0.71  |
| Oral Corticosteroids           | 0.69  |
| Noninvasive Ventilation        | 0.65  |
| IV Antibiotic Days at Home     | 0.5   |
| Weight                         | 0.45  |
| Best FEV1 % Predicted          | 0.41  |
| Height                         | 0.40  |
| Non-IV Hospital Admission      | 0.34  |
| Age                            | 0.32  |
| FEV1                           | 0.23  |
| FEV1 % Predicted (2011)        | 0.21  |
| CFRD                           | 0.15  |
| Diabetes                       | 0.12  |
| Heterozygous                   | 0.10  |
| Homozygous                     | 0.10  |
| FEV1 % Predicted (2010)        | 0.05  |
| FEV1 % Predicted (2009)        | 0.03  |
| Best FEV1                      | 0.02  |
| FEV1 % Predicted (2008)        | 0.02  |

**Table 3.** Variable importance ranked using (normalized) correlation-based feature selection scores.
